# Supplementary material
Source: PubMed Central journal article supplement (PMC3715397)

## **Supplementary Information**

# **Synthesis and evaluation of $N^8$ -acetylspermidine analogues as inhibitors of bacterial acetylpolyamine amidohydrolase**

Christophe Decroos, Christine M. Bowman, David W. Christianson\*

*Roy and Diana Vagelos Laboratories, Department of Chemistry, University of Pennsylvania, Philadelphia, PA 19104-6323, USA*

\* Corresponding author. Tel: +1 215 898 5714. E-mail address: [chris@sas.upenn.edu](mailto:chris@sas.upenn.edu)

Compound I:  $^1\text{H}$  NMR in  $\text{D}_2\text{O}$  (500 MHz)

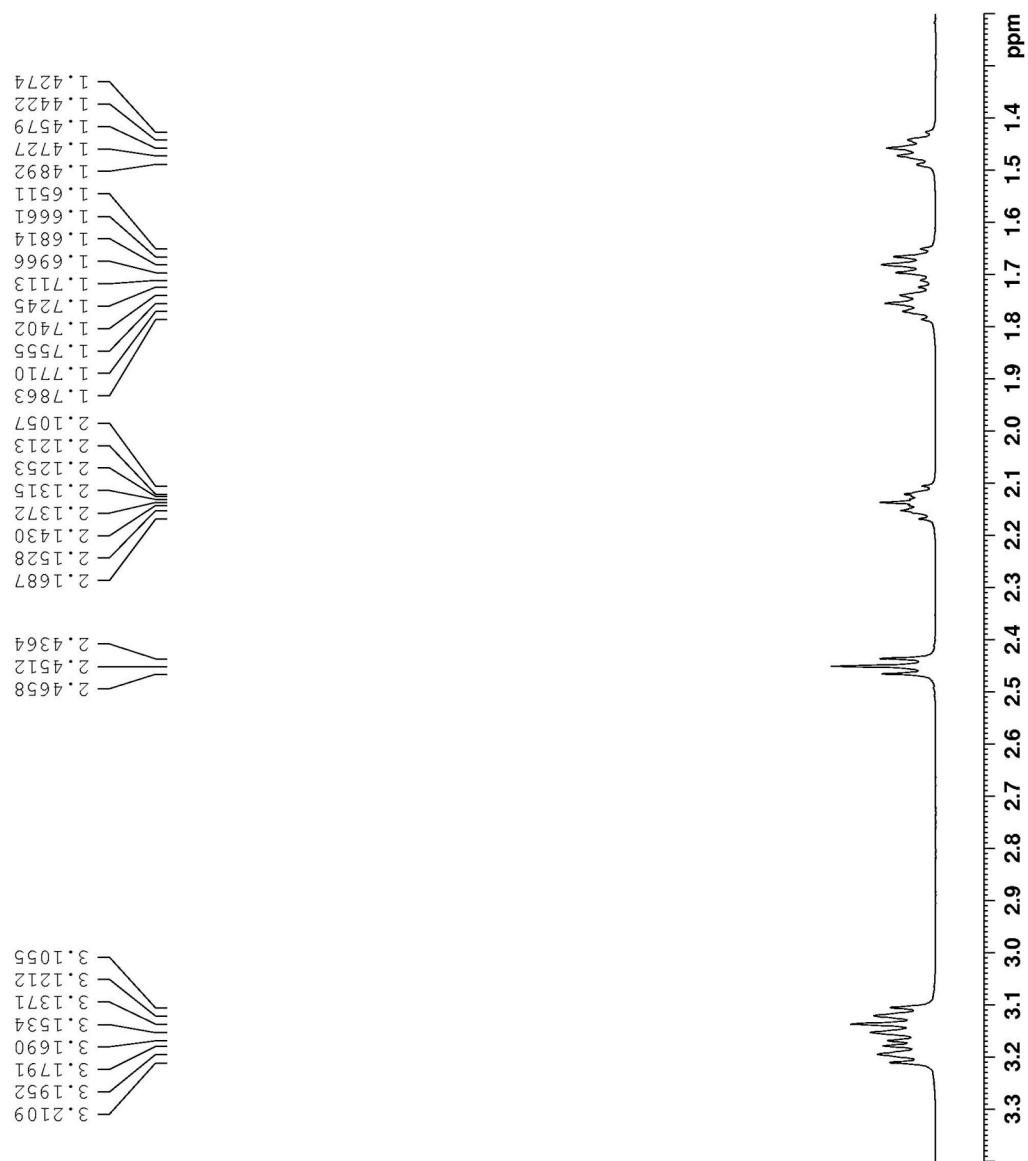

Compound I:  $^{13}\text{C}$  NMR in  $\text{D}_2\text{O}$  (125.6 MHz)

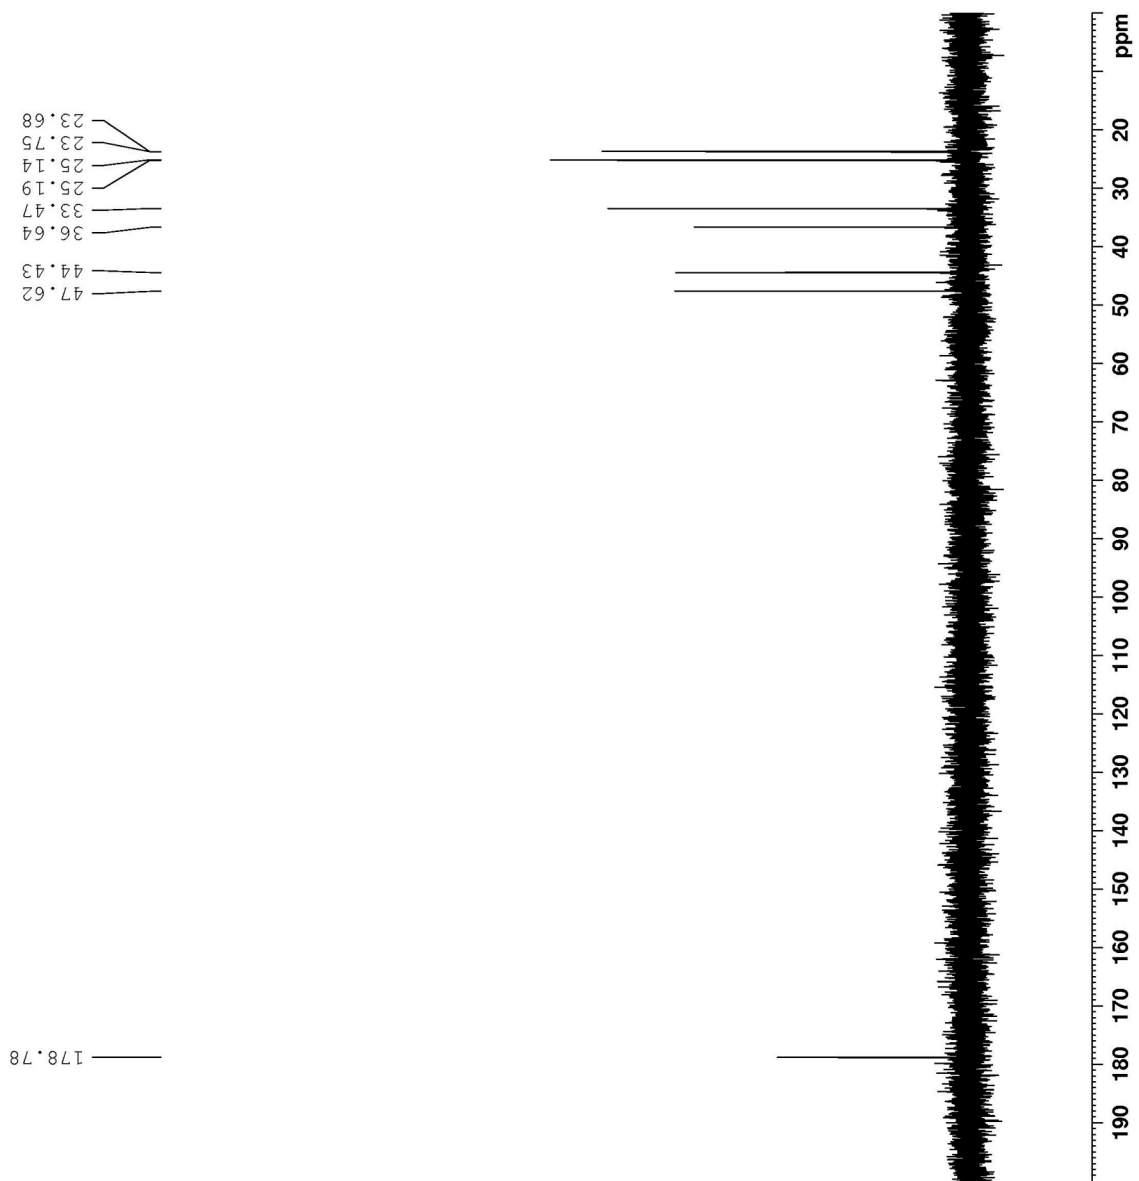

Compound II:  $^1\text{H}$  NMR in  $\text{D}_2\text{O}$  (500 MHz)

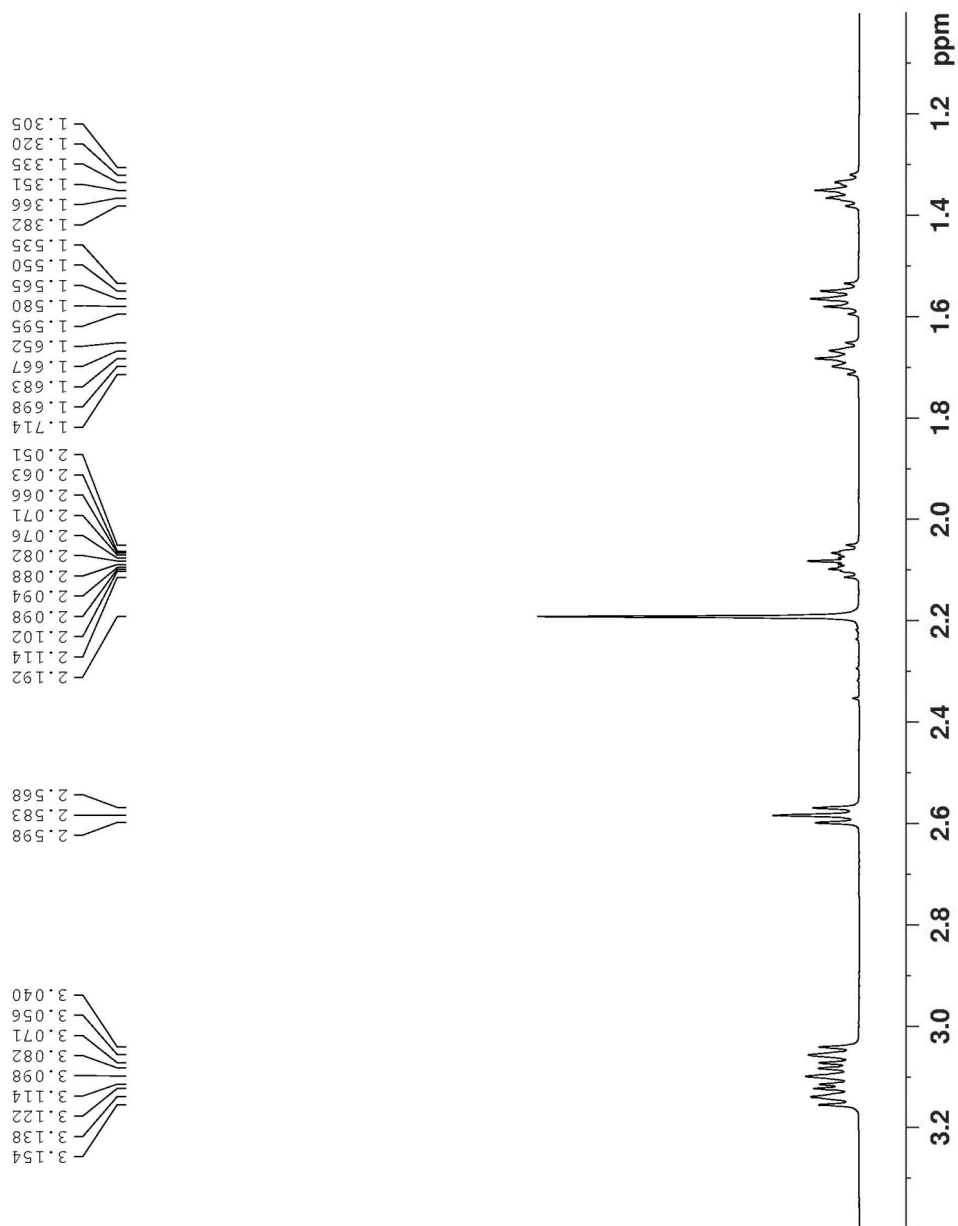

Compound II:  $^{13}\text{C}$  NMR in  $\text{D}_2\text{O}$  (125.6 MHz)

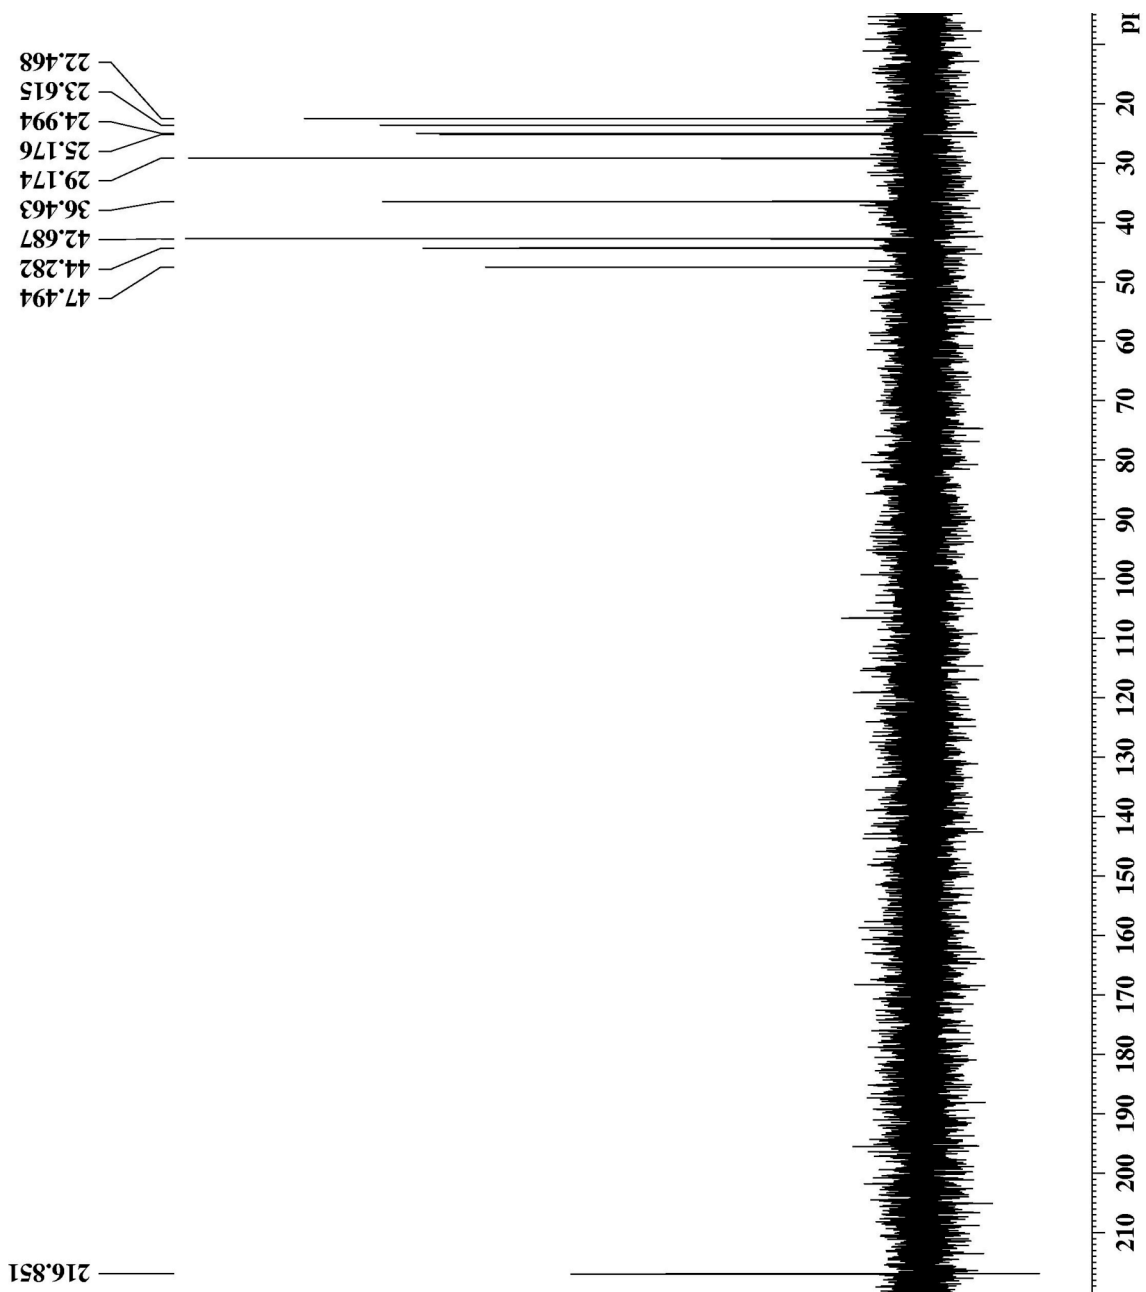

Compound **III**:  $^1\text{H}$  NMR in  $\text{D}_2\text{O}$  (500 MHz)

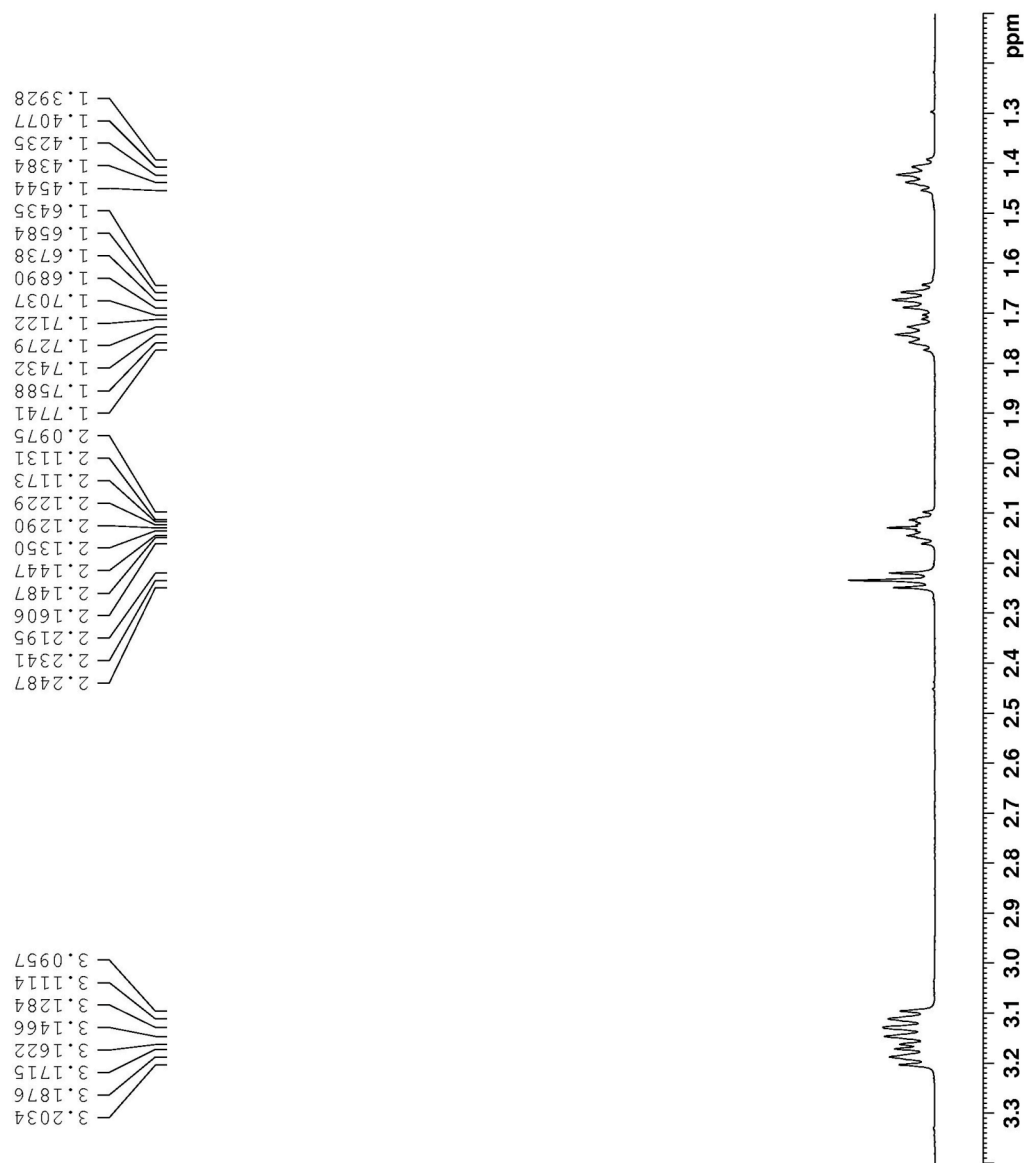

Compound **III**:  $^{13}\text{C}$  NMR in  $\text{D}_2\text{O}$  (125.6 MHz)

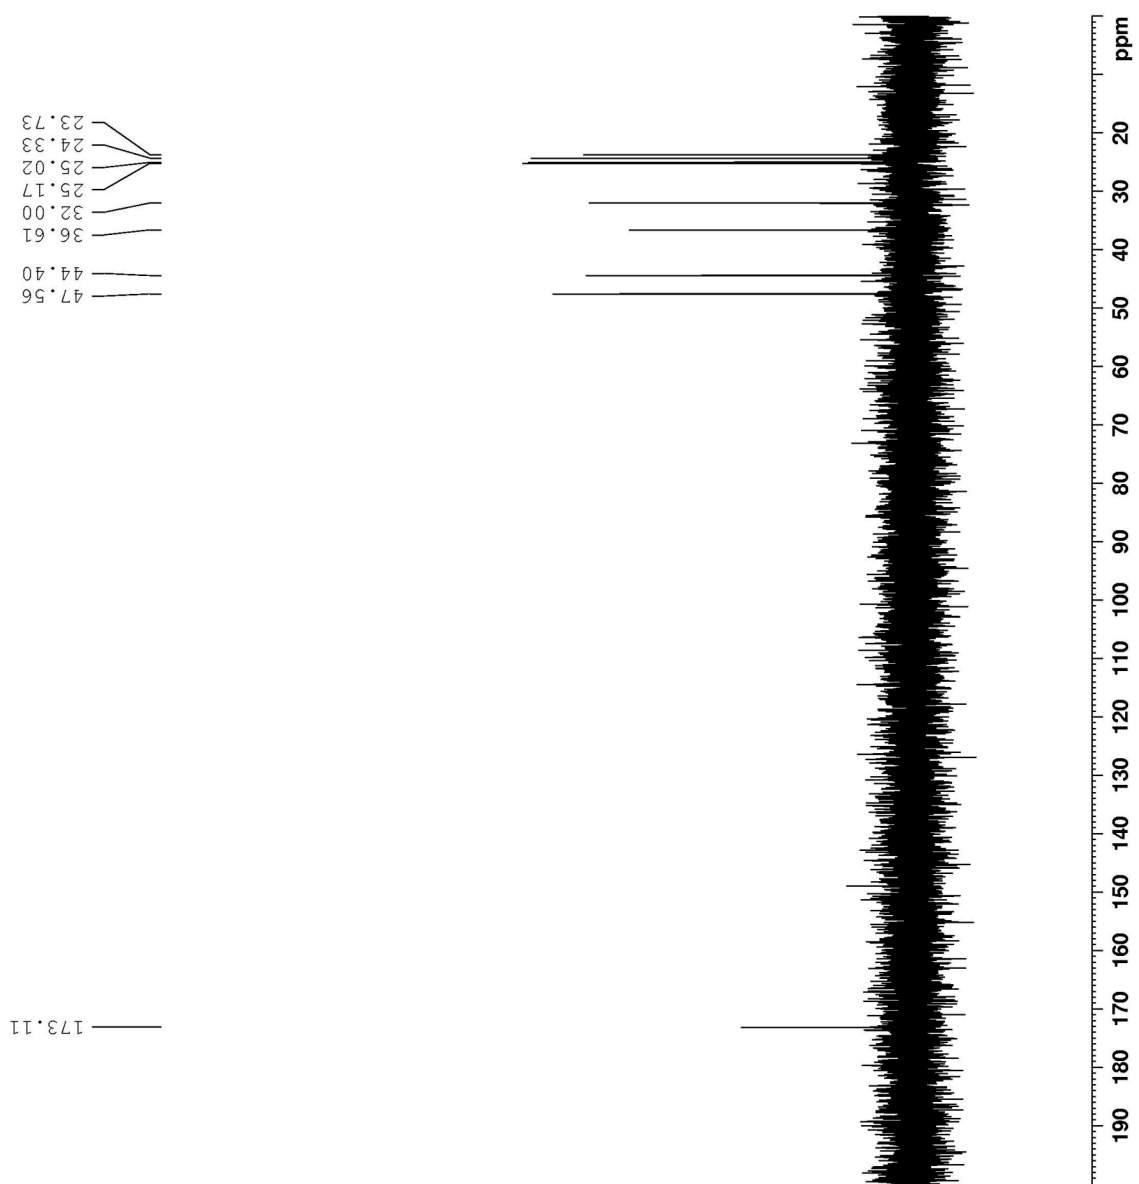

Compound IV:  $^1\text{H}$  NMR in  $\text{D}_2\text{O}$  (500 MHz) (*gem*-diol form)

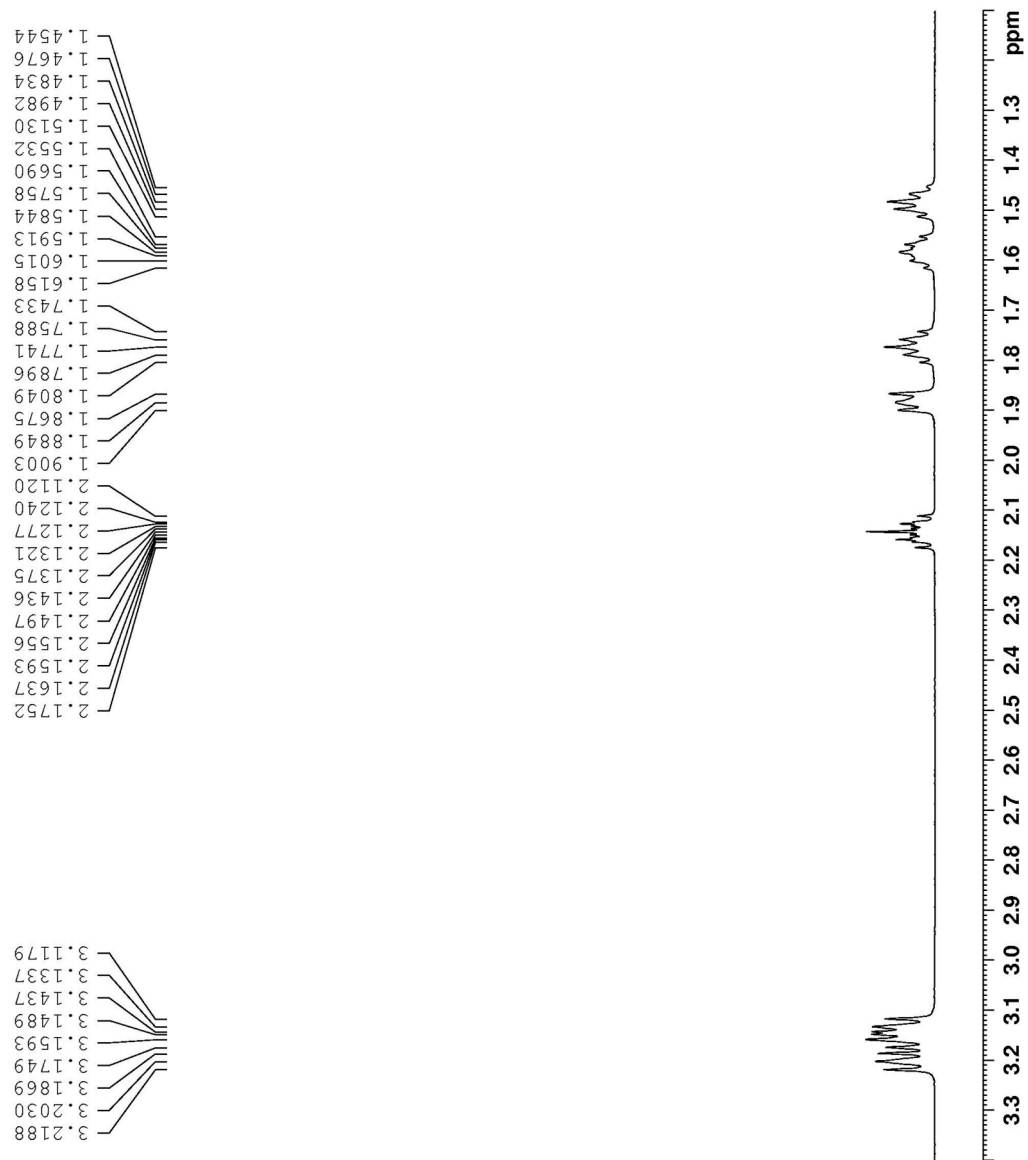



Compound IV:  $^{13}\text{C}$  NMR in  $\text{D}_2\text{O}$  (125.6 MHz) (*gem*-diol form)

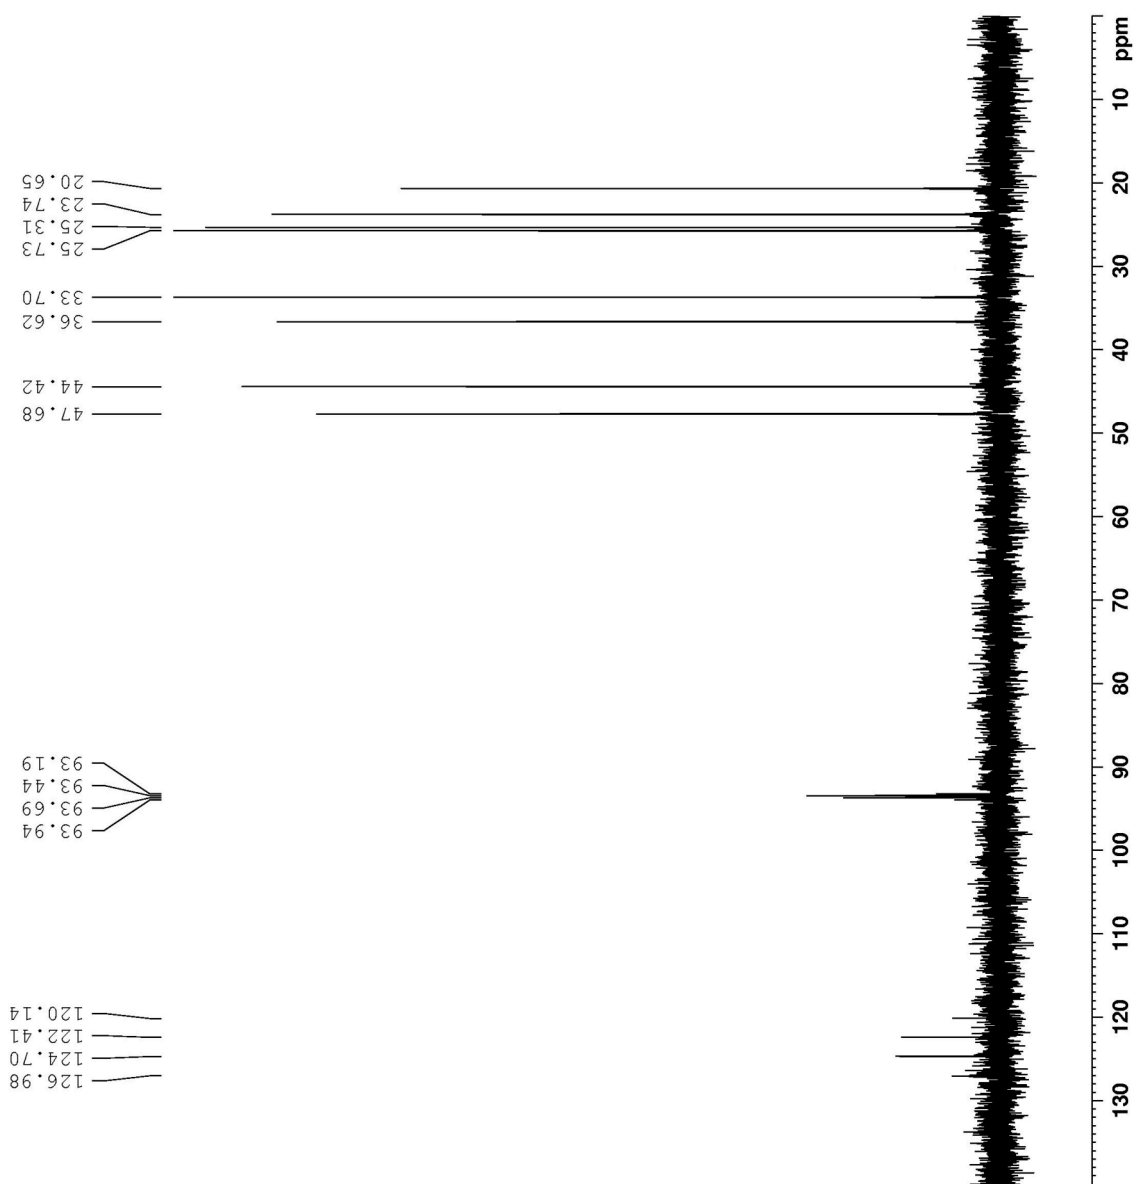

Compound **IV**:  $^{19}\text{F}$  NMR in  $\text{D}_2\text{O}$  (282.4 MHz) (*gem*-diol form)

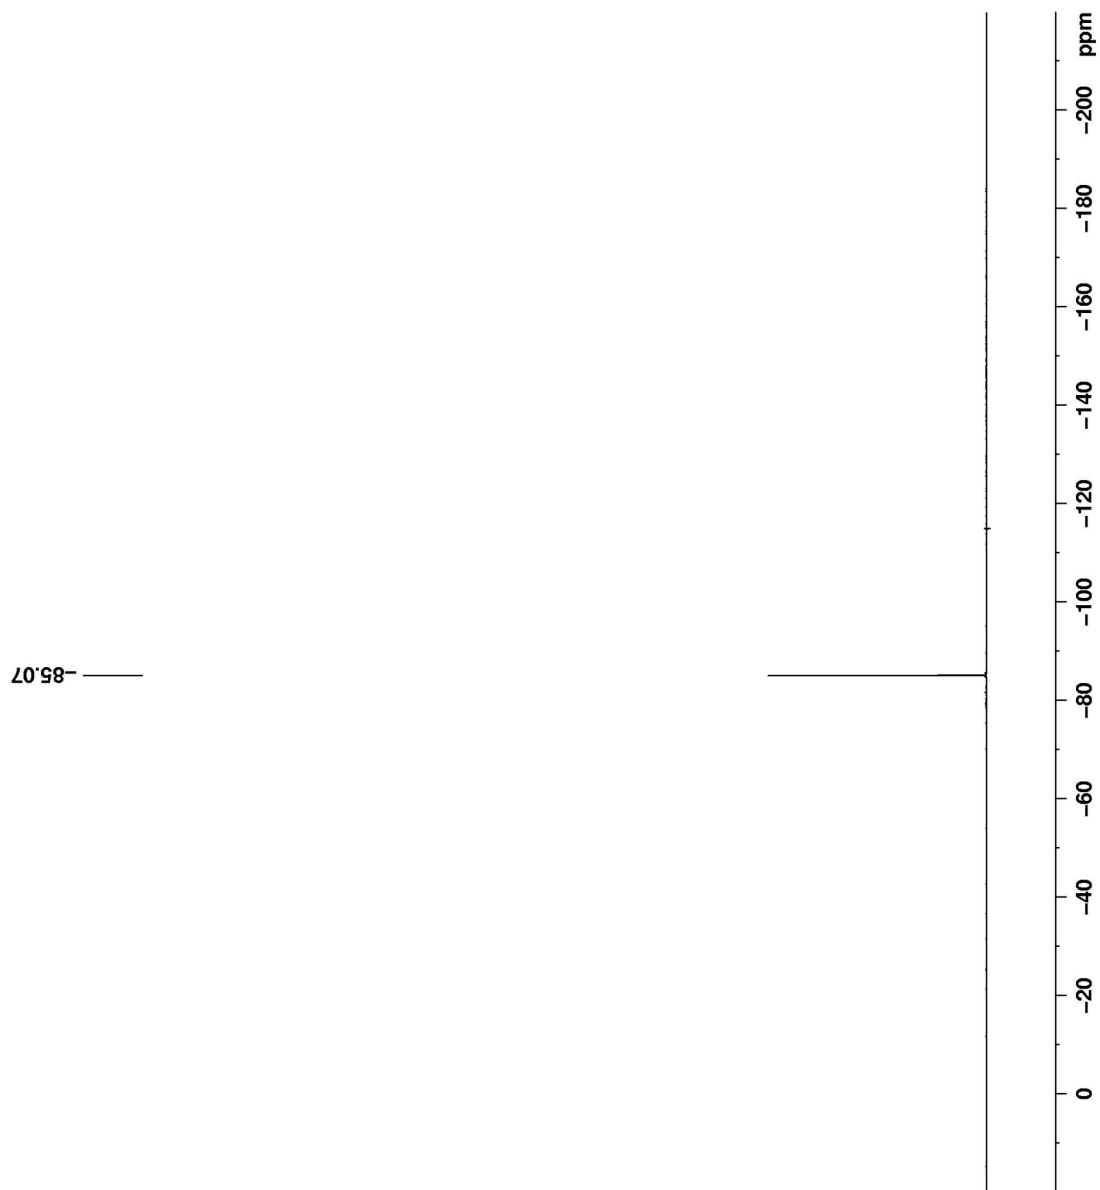

Compound V:  $^1\text{H}$  NMR in  $\text{D}_2\text{O}$  (500 MHz)

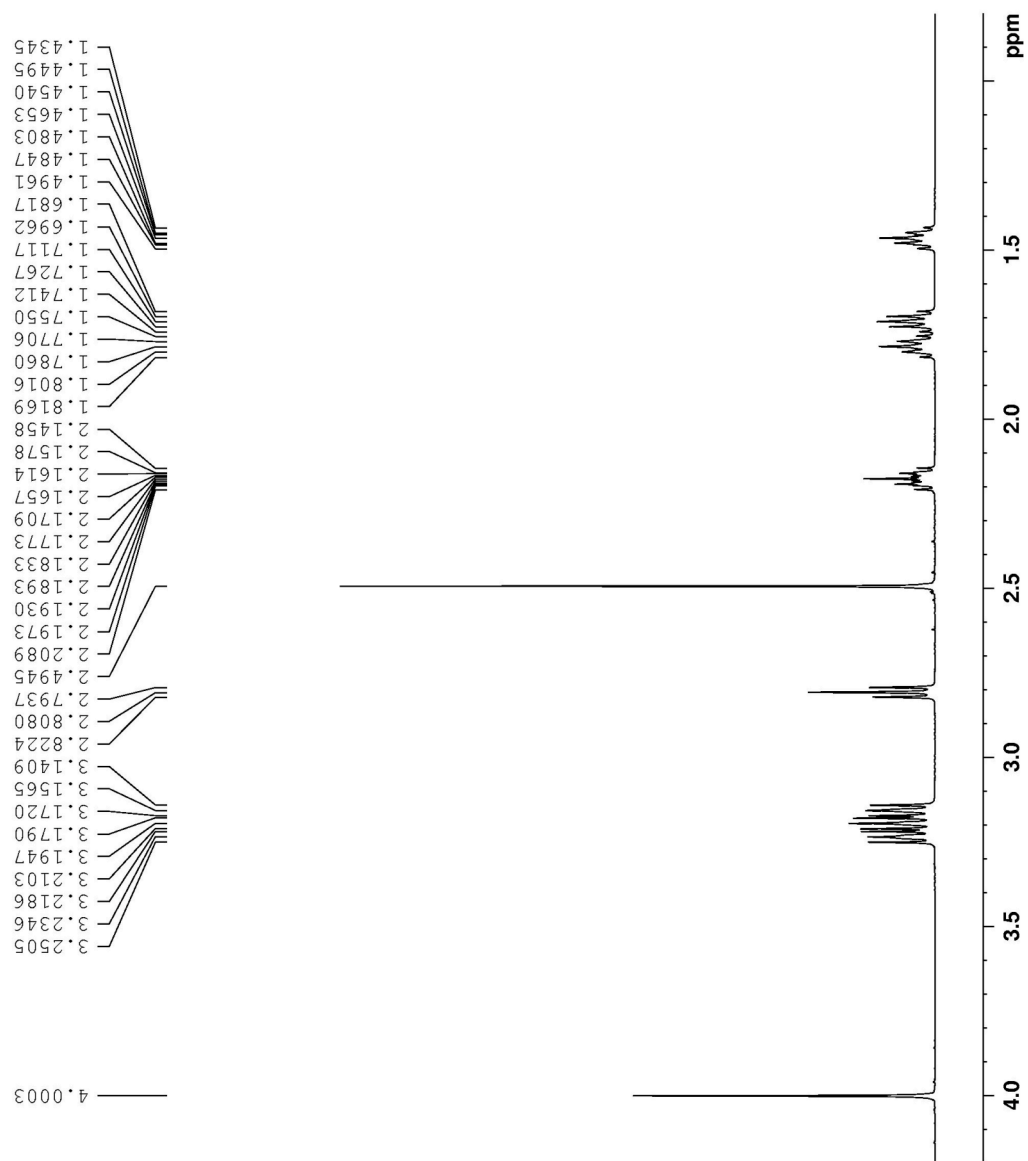

Compound V:  $^{13}\text{C}$  NMR in  $\text{D}_2\text{O}$  (125.6 MHz)

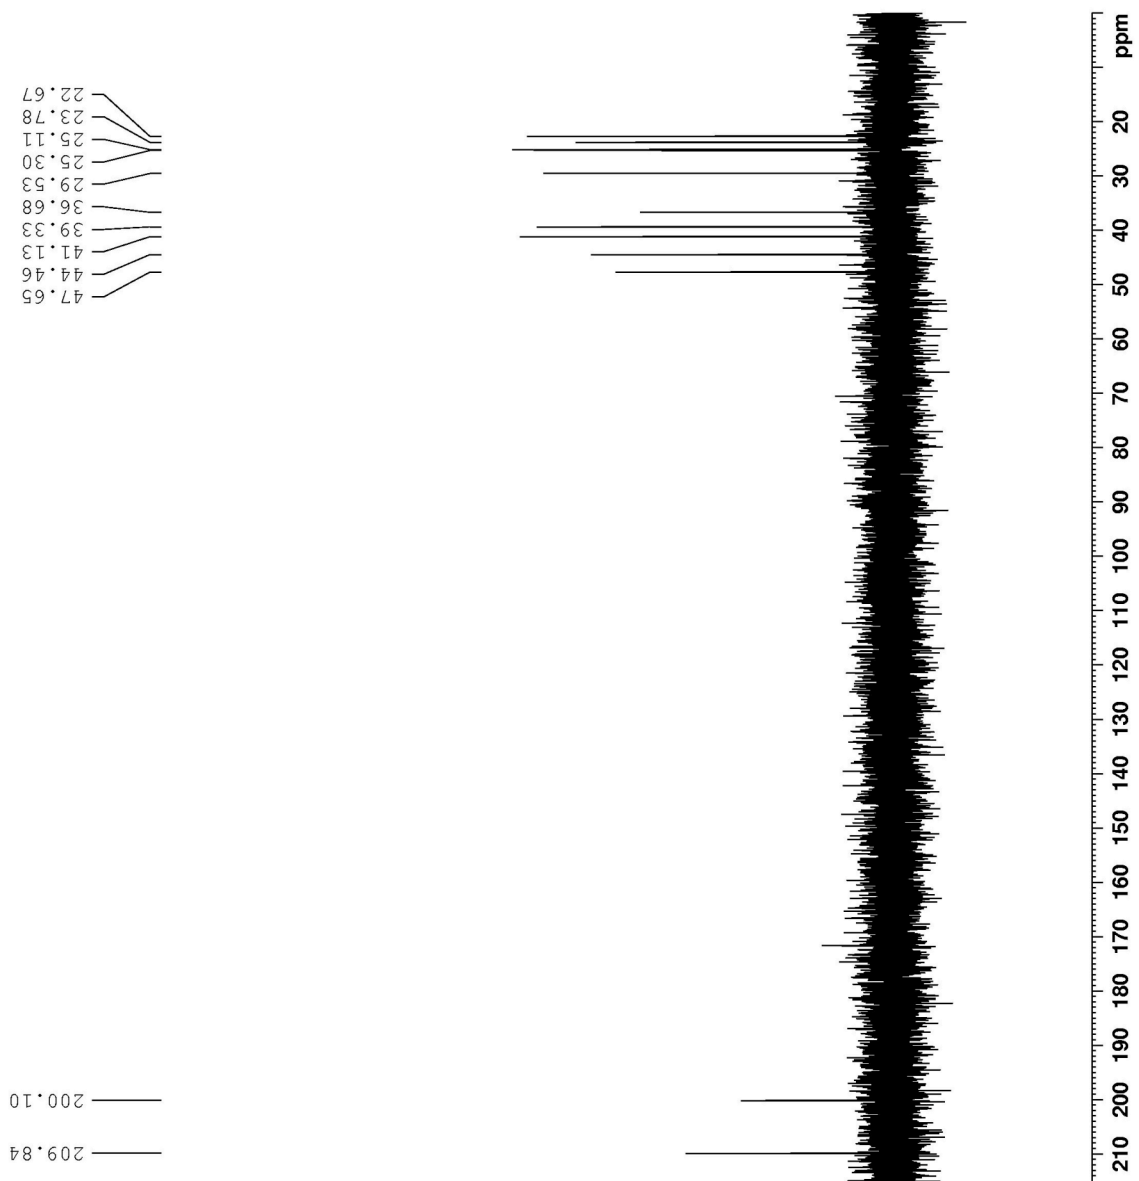

Compound VI:  $^1\text{H}$  NMR in  $\text{D}_2\text{O}$  (500 MHz)

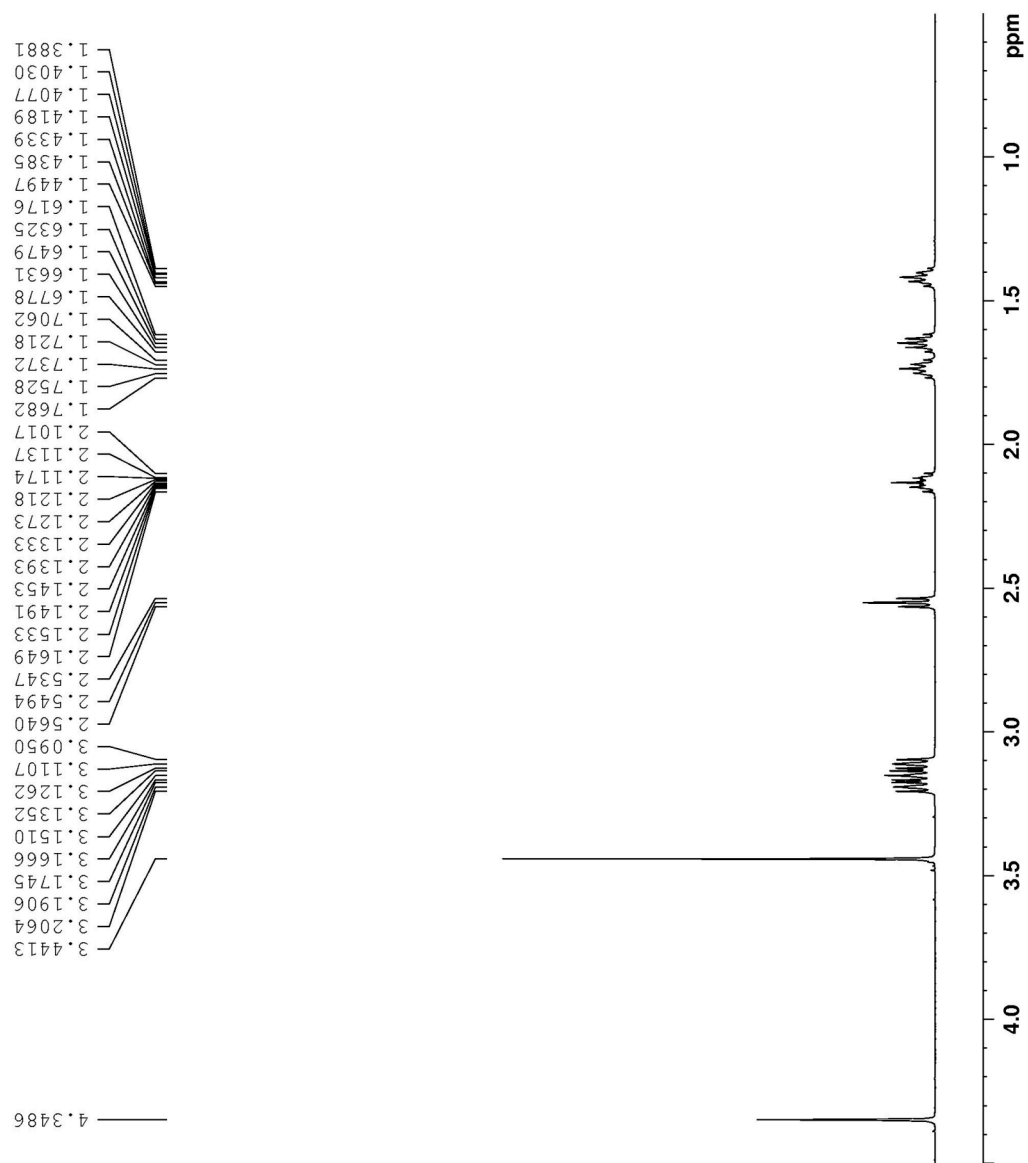

Compound VI:  $^{13}\text{C}$  NMR in  $\text{D}_2\text{O}$  (125.6 MHz)

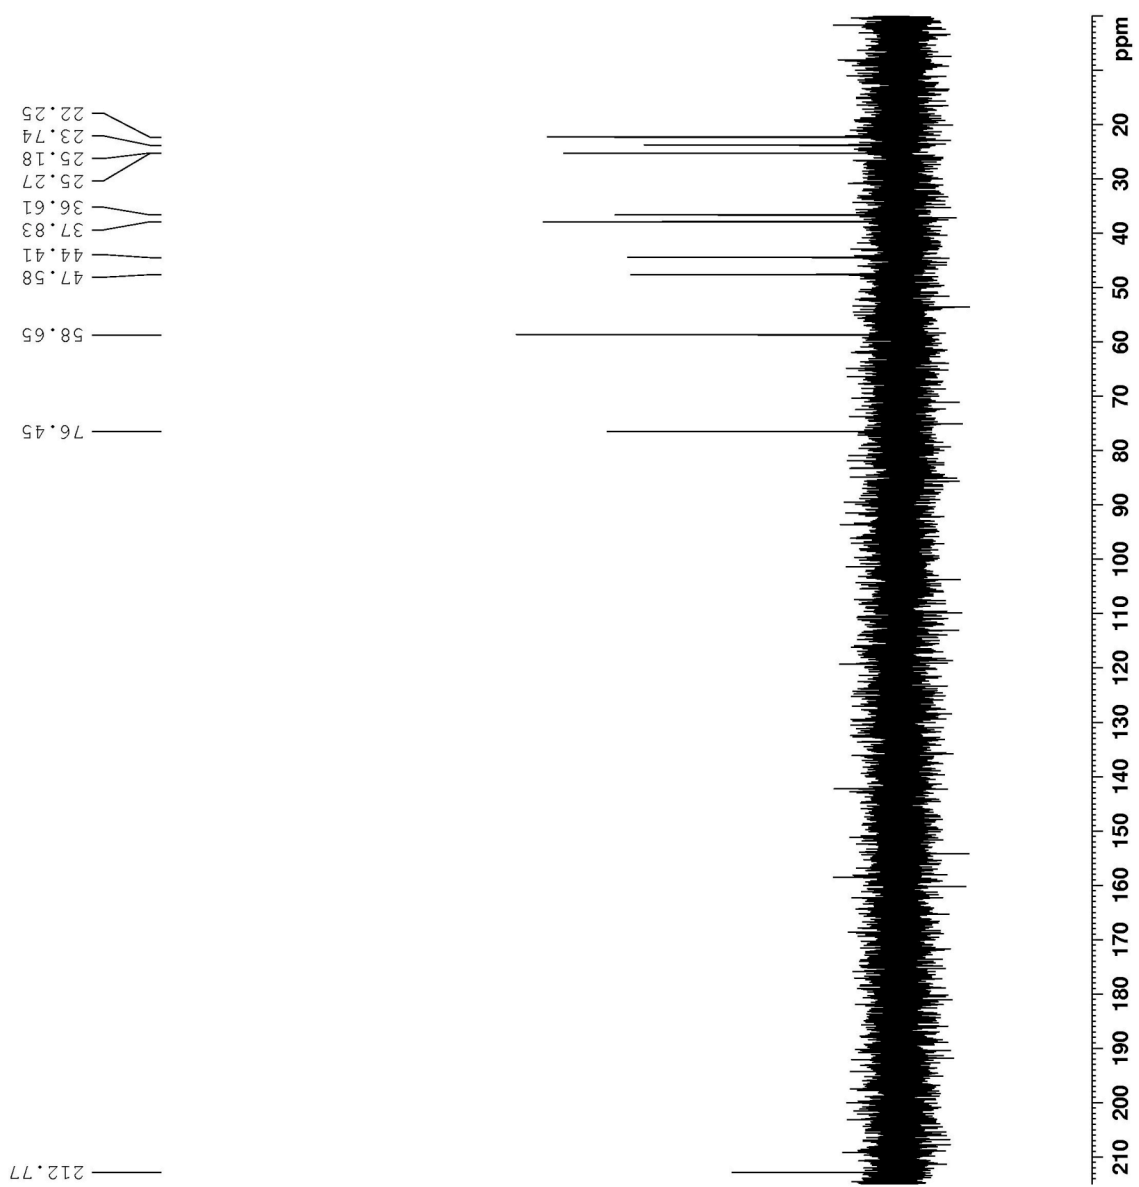

Compound **VII**:  $^1\text{H}$  NMR in  $\text{D}_2\text{O}$  (500 MHz)

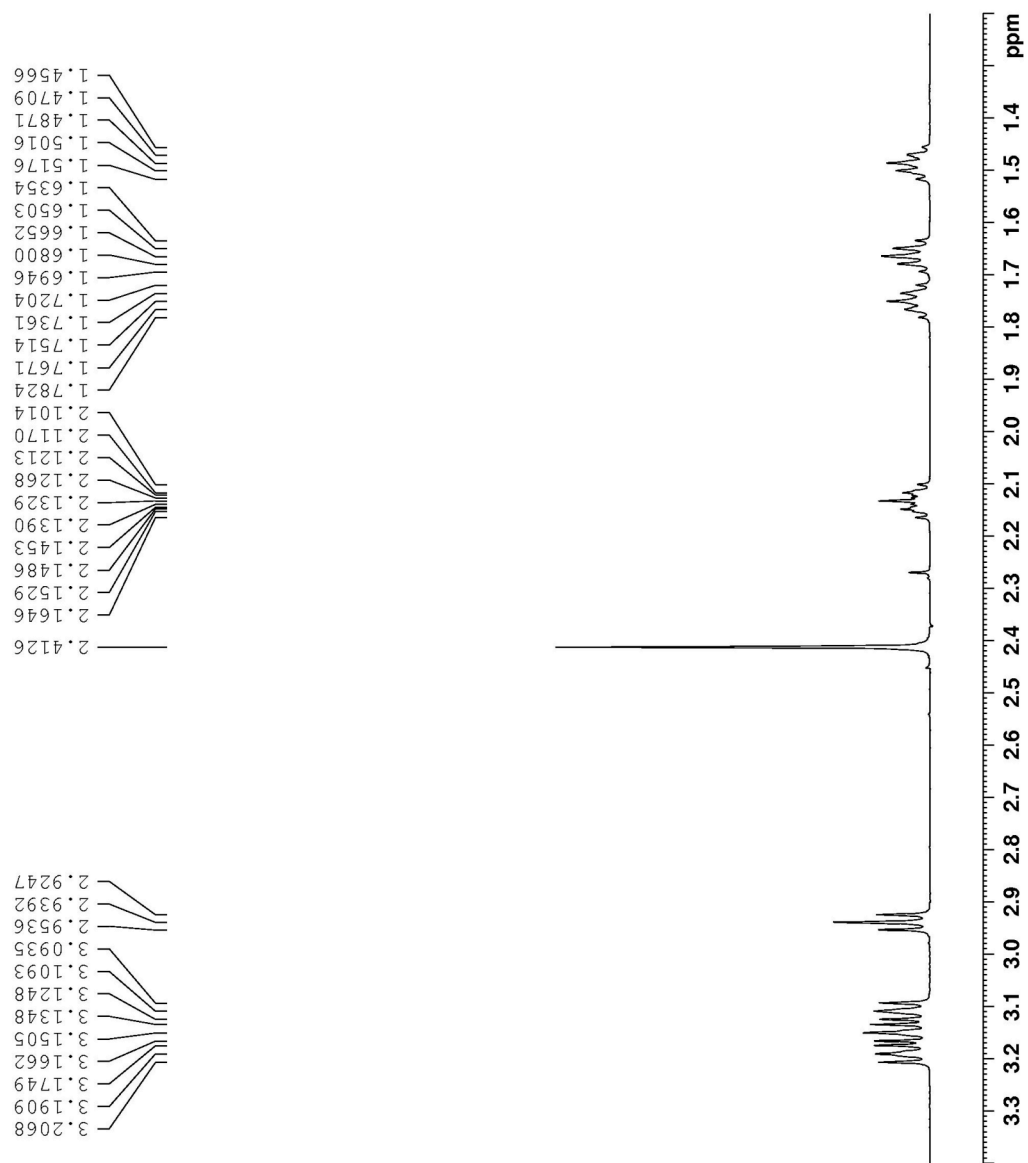

Compound **VII**:  $^{13}\text{C}$  NMR in  $\text{D}_2\text{O}$  (125.6 MHz)

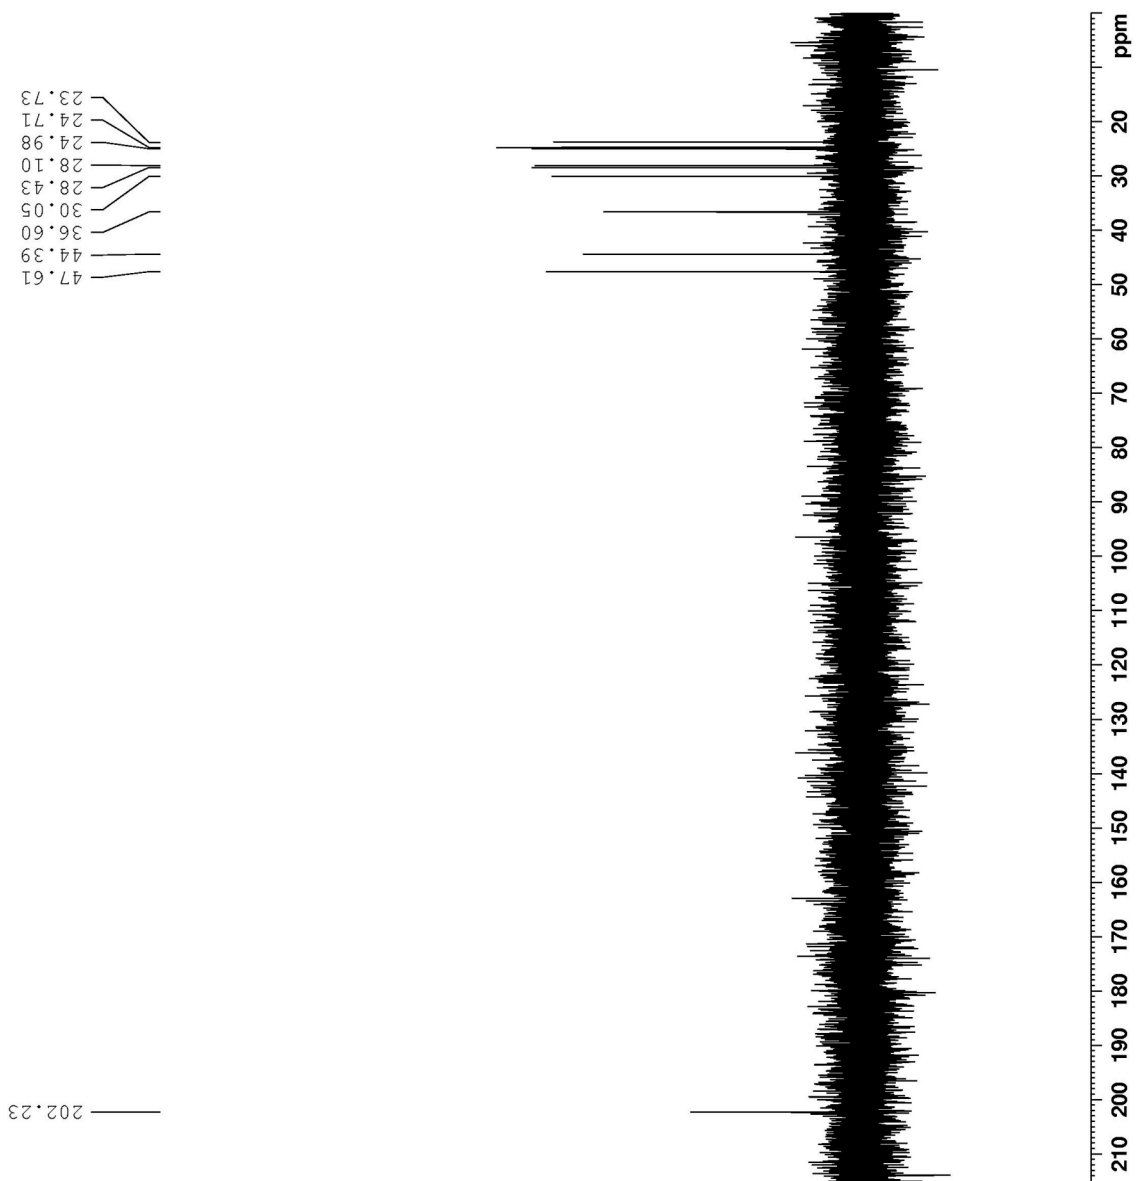



Compound **VIII**:  $^1\text{H}$  NMR in  $\text{D}_2\text{O}$  (500 MHz)

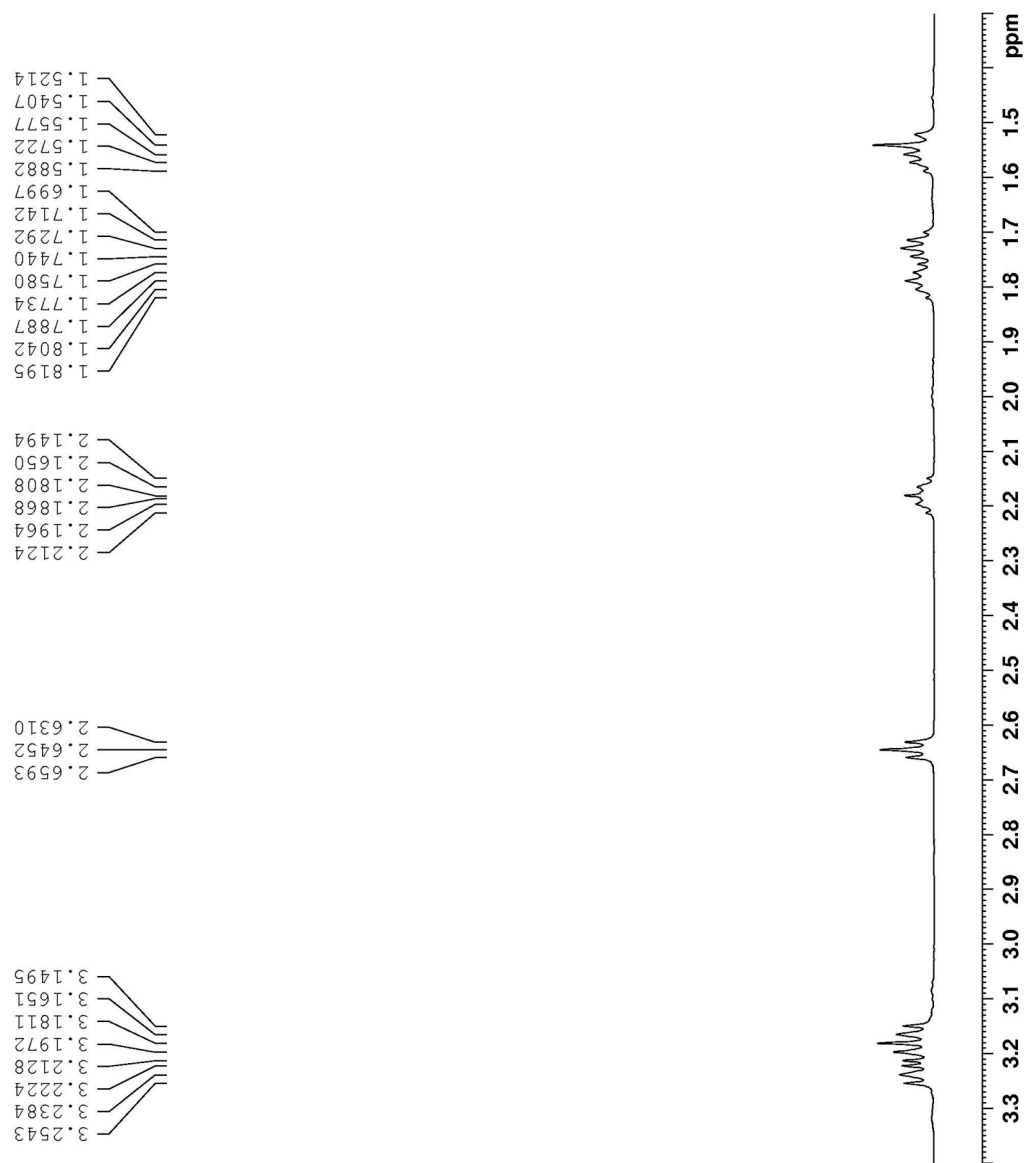

Compound **VIII**:  $^{13}\text{C}$  NMR in  $\text{D}_2\text{O}$  (125.6 MHz)

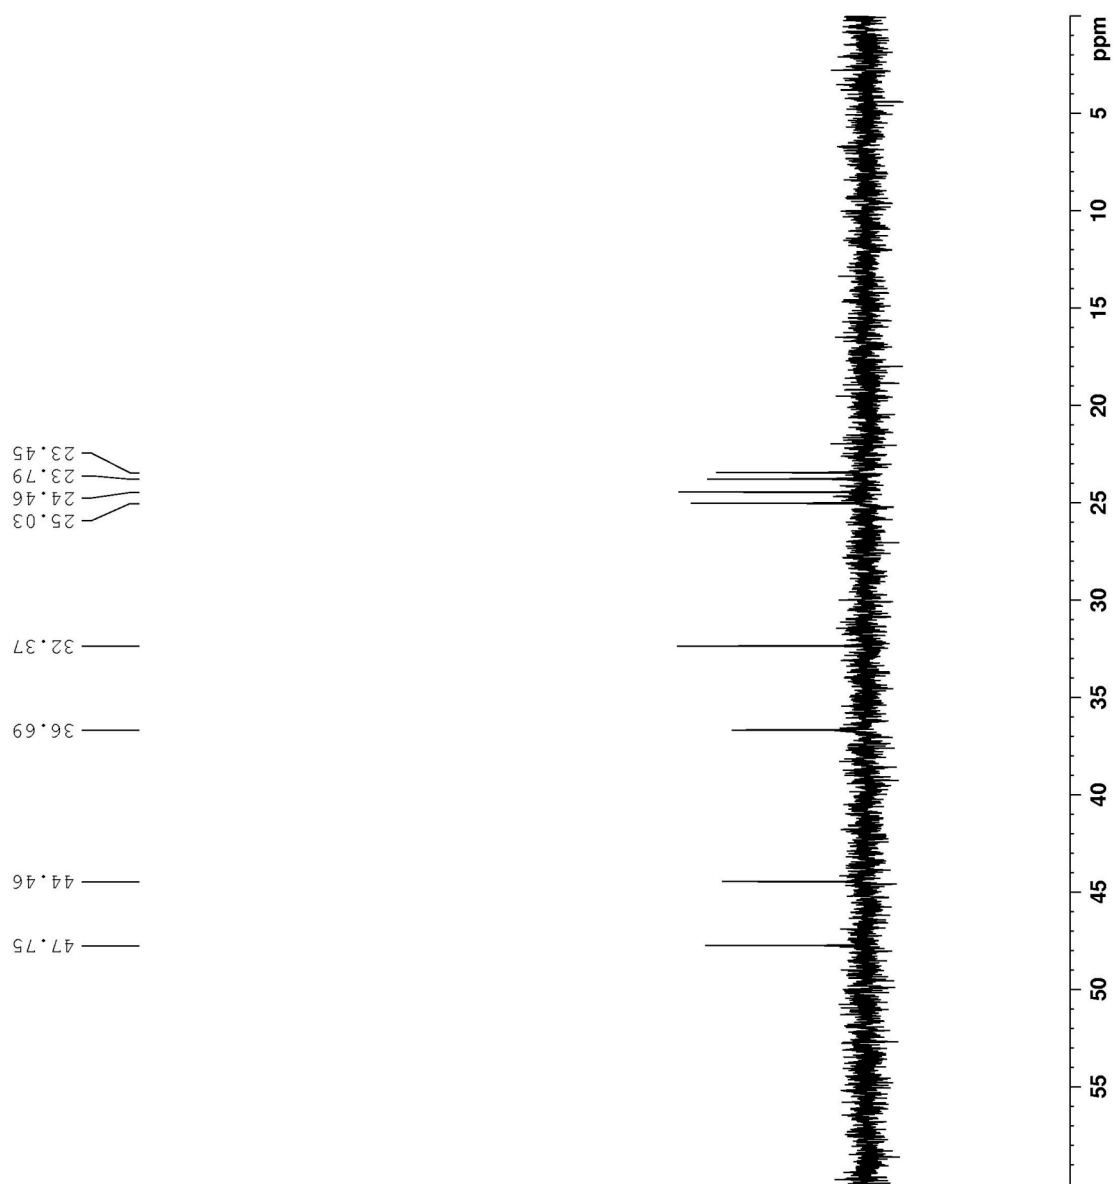

Compound IX:  $^1\text{H}$  NMR in  $\text{D}_2\text{O}$  (500 MHz)

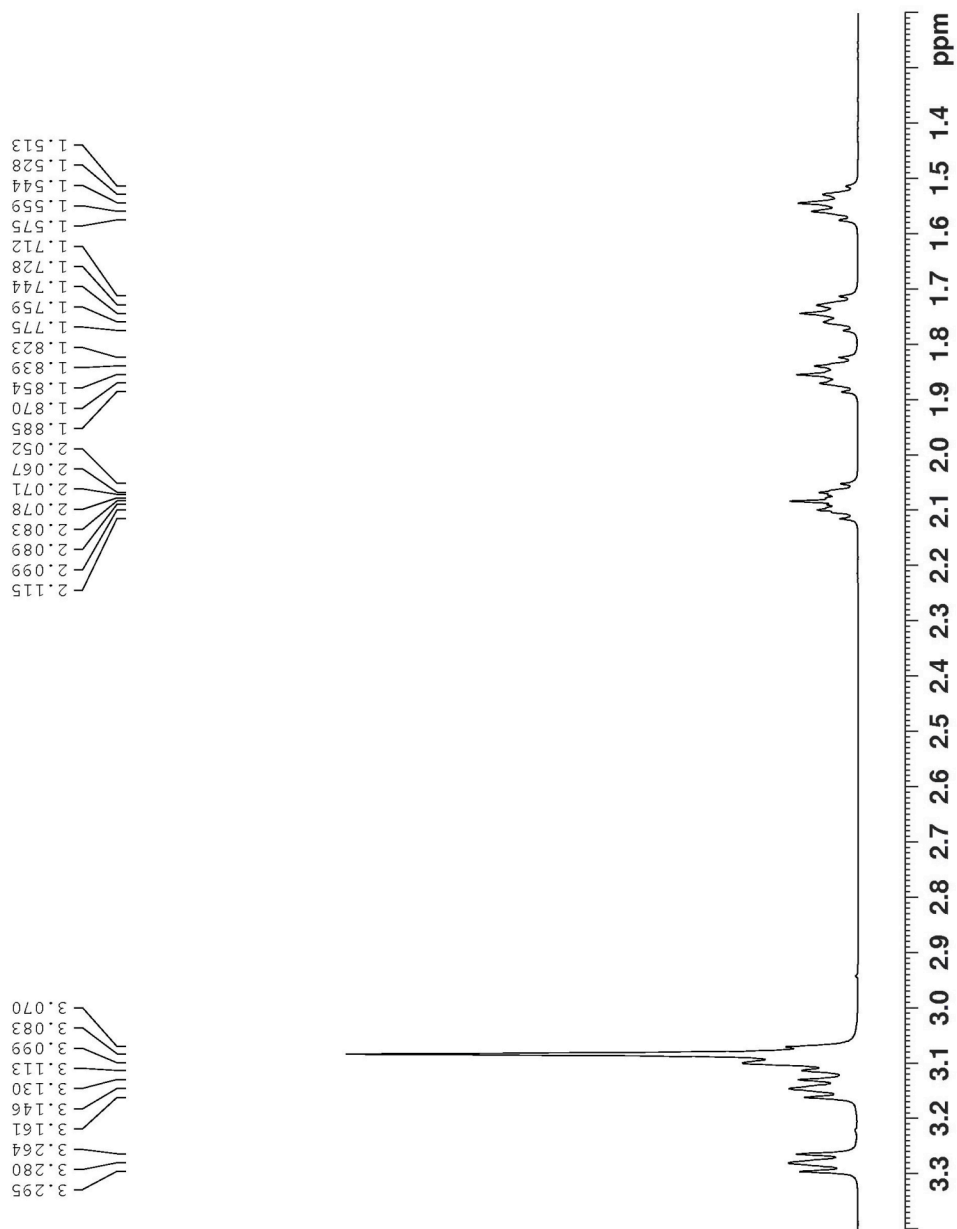

Compound IX:  $^{13}\text{C}$  NMR in  $\text{D}_2\text{O}$  (125.6 MHz)

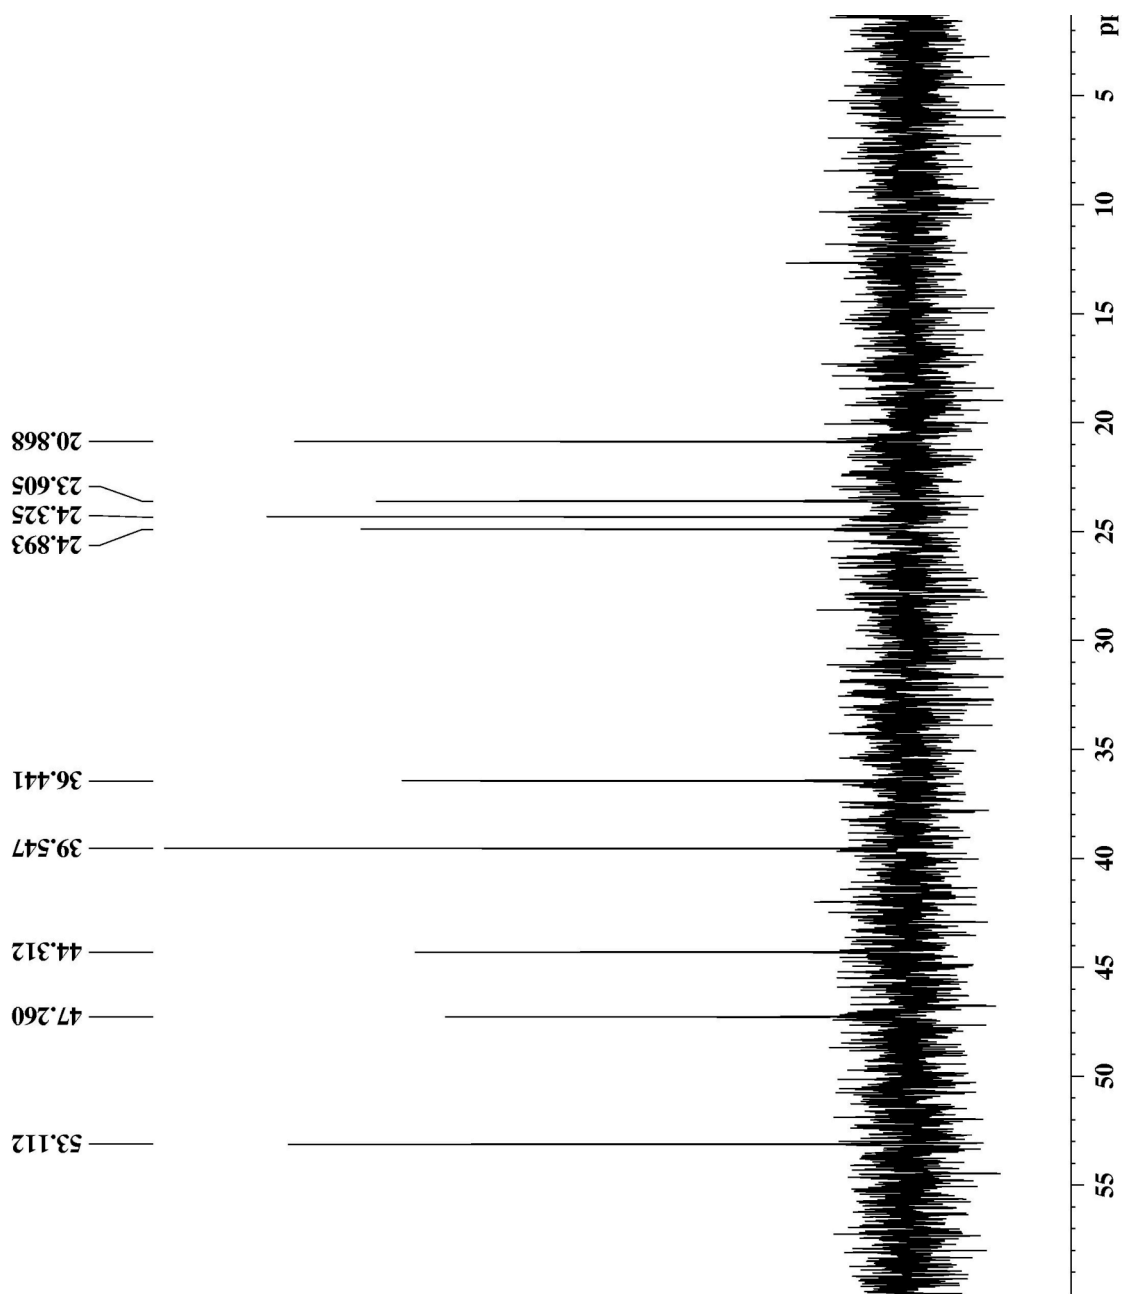

Compound X:  $^1\text{H}$  NMR in  $\text{D}_2\text{O}$  (500 MHz)

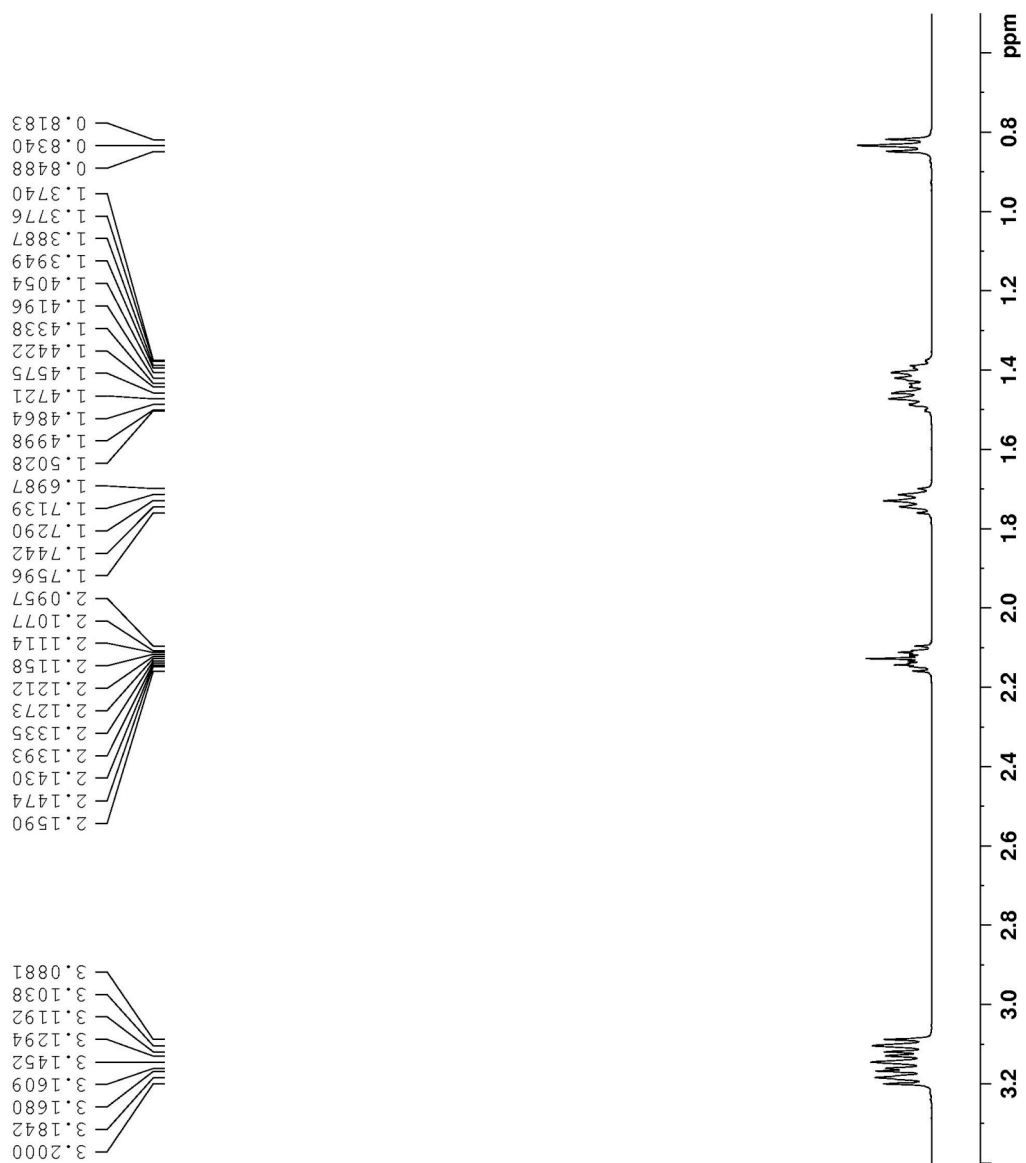

Compound X:  $^{13}\text{C}$  NMR in  $\text{D}_2\text{O}$  (125.6 MHz)

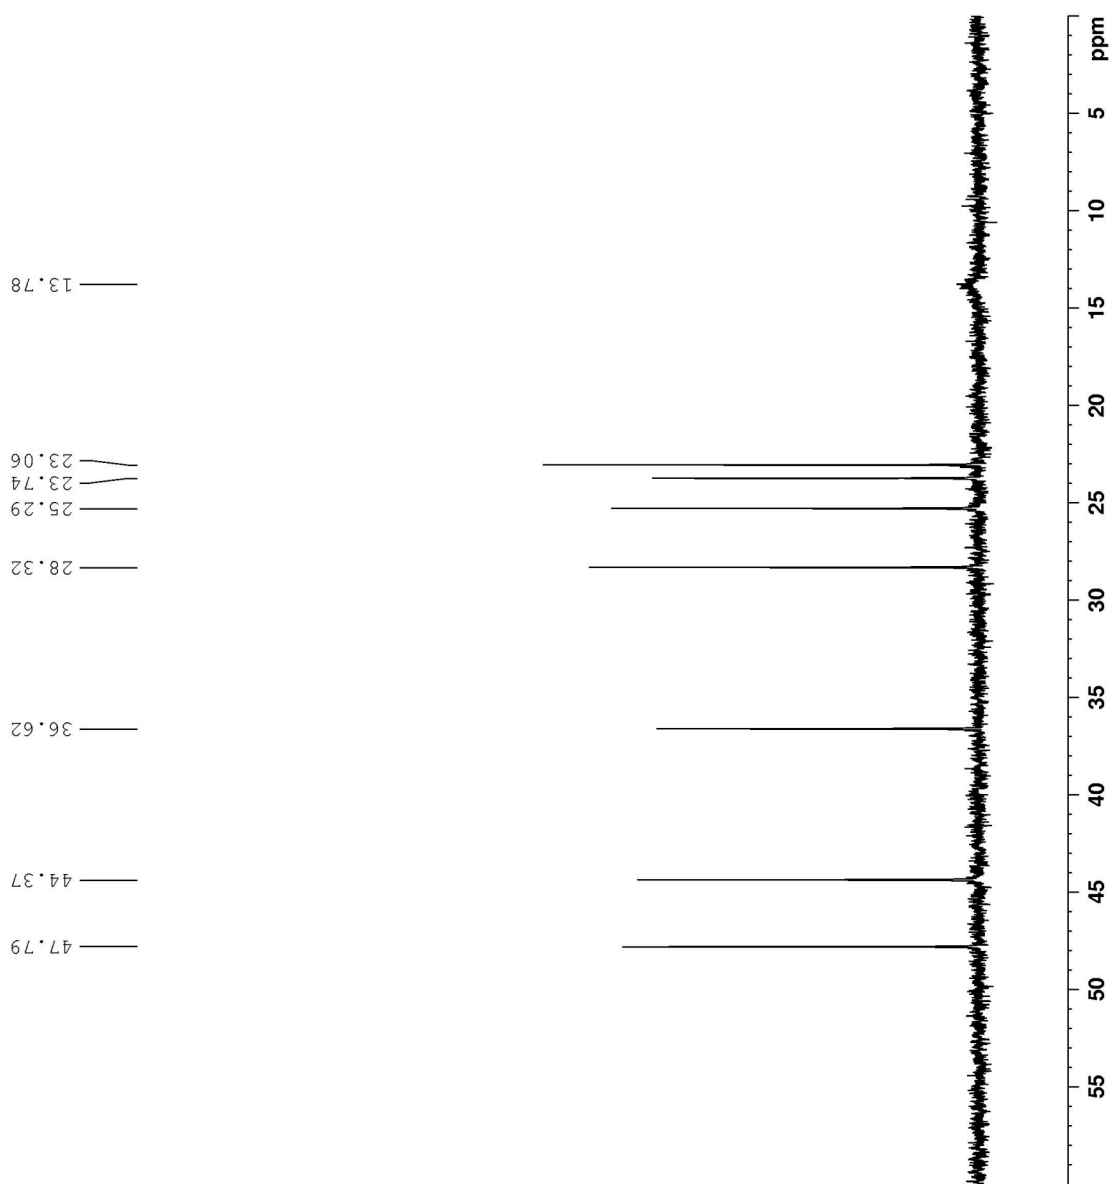

Compound **X**:  $^{11}\text{B}$  NMR in  $\text{D}_2\text{O}$  (128 MHz)

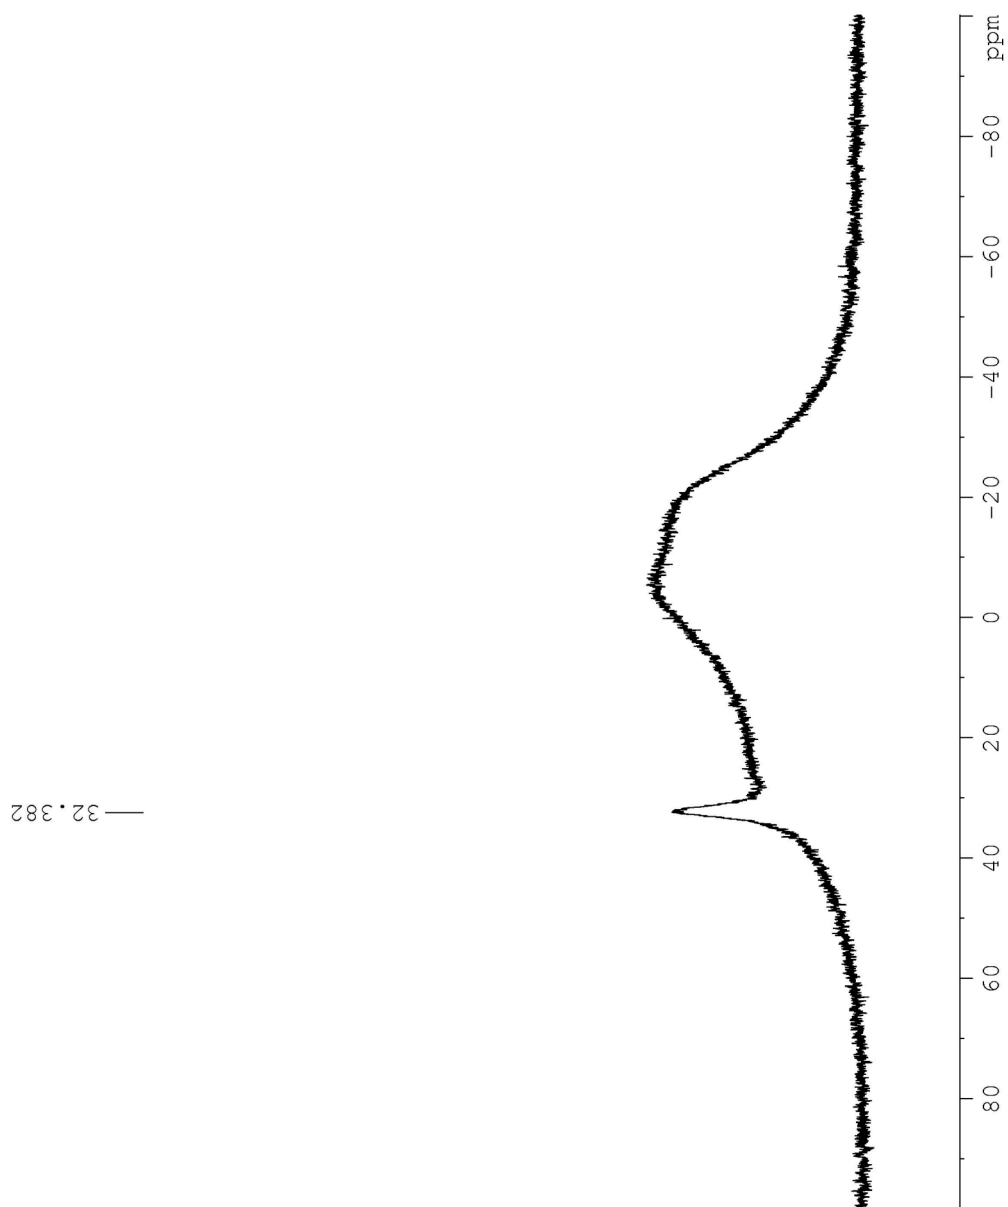

Supplement: NIHMS487896-supplement-01.pdf [file NIHMS487896-supplement-01.pdf]
